# Supplementary material
Source: PubMed Central journal article supplement (PMC3502922)
Supplement: AEM.02310-12_zam999103913so1.pdf [file AEM.02310-12_zam999103913so1.pdf]

## 1                   **Materials and Methods**

2   **Bacteria strains and growth conditions.** 230 *S. enterica* strains were isolated *post mortem*  
3 from deceased harbour porpoises between 1992 and 2010 (Table S2). Isolates were stored on  
4 Dorset Egg slopes at ambient temperature since their isolation. Bacterial cultures were grown  
5 at 37°C overnight in Tryptone Soya broth (CM0129, Oxoid Ltd., Basingstoke, UK), which  
6 was supplemented with 35.6 mM K<sub>2</sub>HPO<sub>4</sub>, 13.2 mM KH<sub>2</sub>PO<sub>4</sub>, 0.8 mM MgSO<sub>4</sub>, 1.7 mM  
7 C<sub>6</sub>H<sub>5</sub>Na<sub>3</sub>O<sub>7</sub>·2H<sub>2</sub>O, 6.8 mM (NH<sub>4</sub>)<sub>2</sub>SO<sub>4</sub> and 4.4% (v/v) glycerol to allow freezing immediately  
8 after cultivation.

9 The properties of 21 porpoise isolates plus 27 additional strains of related serovars that were  
10 tested by MLST are listed in Table S3.

11 **Pulsed-field gel electrophoresis.** PFGE typing was performed as described (4,5). TIFF  
12 images were analysed with Bionumerics Version 5 (Applied Maths, Belgium) with  
13 optimization set at 1% and band tolerance at 1.3%. Relationships were determined by Dice  
14 correlation and UPGMA clustering. Only restriction fragments of >30 kb were included in  
15 the analysis.

16 **Multilocus sequence typing.** DNA was extracted using an X-tractor Gene fluidics robot  
17 (Corbett, Australia) as described by the manufacturer except that the lysis step was performed  
18 with the JETFLEX Genomic DNA Purification Kit (Genomed, Germany). The *aroC*, *dnaN*,  
19 *hemD*, *hisD*, *purE*, *sucA* and *thrA* gene fragments were amplified and sequenced from at least  
20 two independent PCR products in forward and reversed orientation as described (2), except  
21 that the PCR and sequencing primers used were those listed on the *Salmonella* MLST website  
22 (<http://mlst.ucc.ie/dbs/Senterica>). All results are publicly available at the MLST website.

23 **PCR amplification and sequencing of *fliC* and *fljB*.** PCR amplification of *fliC* and *fljB* was  
24 carried out as described (1). When PCR amplification of *fljB* failed with the external PCR  
25 primers, internal sequencing primers specific for phase 2 antigen groups “e,n” and “1” were  
26 used instead (Table S3). 10 µl PCR products were digested with 1 µl of ExoSAPIT  
27 (Affymetrix, USA) for 15 minutes at 37°C, followed by 15 minutes inactivation at 80°C. The  
28 cleaned PCR product was diluted 1:10 with H<sub>2</sub>O and 3 µl of diluted PCR product were used  
29 as template in a total volume of 10 µl sequencing reaction containing sequencing primers  
30 (Table S4) at a final concentration of 4 pmol. The sequencing reaction consisted of an initial  
31 denaturation at 96°C for 2 minutes, followed by 30 cycles of denaturation for 10s at 96°C,  
32 annealing for 5s at 50°C (*fliC*) or 47° (*fljB*) and elongation for 2 minutes at 60°C. The  
33 sequencing products were purified by ethanol precipitation and sequenced at the sequencing  
34 facility at the Department of Zoology at Oxford University, UK. Traces were assembled and  
35 analysed with Bionumerics Version 6 (Applied Maths, Belgium). The sequences, trimmed to  
36 positions 37-1463 of *fliC* and 165-1357 of *fljB* of strain LT2, have been submitted to the  
37 EMBL-EBI nucleotide database under the accession numbers HE801371 to HE801515.  
38 Nonsynonymous (dN) and synonymous (dS) substitution rates were calculated using the Nei-  
39 Gojobori model implemented in Mega Version 5.05 (3,6).

40

- 42 1. **Dauga, C., A. Zabrovskaja, and P. A. Grimont.** 1998. Restriction Fragment Length  
43 Polymorphism Analysis of Some Flagellin Genes of *Salmonella enterica*. *J. Clin.*  
44 *Microbiol.* **36**:2835-2843.
- 45 2. **Kidgell, C., U. Reichard, J. Wain, B. Linz, M. Torpdahl, G. Dougan, and M.**  
46 **Achtman.** 2002. *Salmonella typhi*, the causative agent of typhoid fever, is  
47 approximately 50,000 years old. *Infect. Genet. Evol.* **2**:39-45.
- 48 3. **Nei, M. and T. Gojobori.** 1986. Simple methods for estimating the numbers of  
49 synonymous and nonsynonymous nucleotide substitutions. *Mol. Biol. Evol.* **3**:418-426.
- 50 4. **Ribot, E. M., M. A. Fair, R. Gautom, D. N. Cameron, S. B. Hunter, B.**  
51 **Swaminathan, and T. J. Barrett.** 2006. Standardization of pulsed-field gel  
52 electrophoresis protocols for the subtyping of *Escherichia coli* O157:H7, *Salmonella*,  
53 and *Shigella* for PulseNet. *Foodborne. Pathog Dis* **3**:59-67.
- 54 5. **Swaminathan, B., T. J. Barrett, S. B. Hunter, and R. V. Tauxe.** 2001. PulseNet: the  
55 molecular subtyping network for foodborne bacterial disease surveillance, United  
56 States. *Emerg. Infect. Dis.* **7**:382-389.
- 57 6. **Tamura, K., D. Peterson, N. Peterson, G. Stecher, M. Nei, and S. Kumar.** 2011.  
58 MEGA5: molecular evolutionary genetics analysis using maximum likelihood,  
59 evolutionary distance, and maximum parsimony methods. *Mol Biol Evol* **28**:2731-2739.  
60  
61
