# Supplementary material
Source: PubMed Central journal article supplement (PMC3502922)
Supplement: AEM.02310-12_zam999103913so3.pdf [file AEM.02310-12_zam999103913so3.pdf]

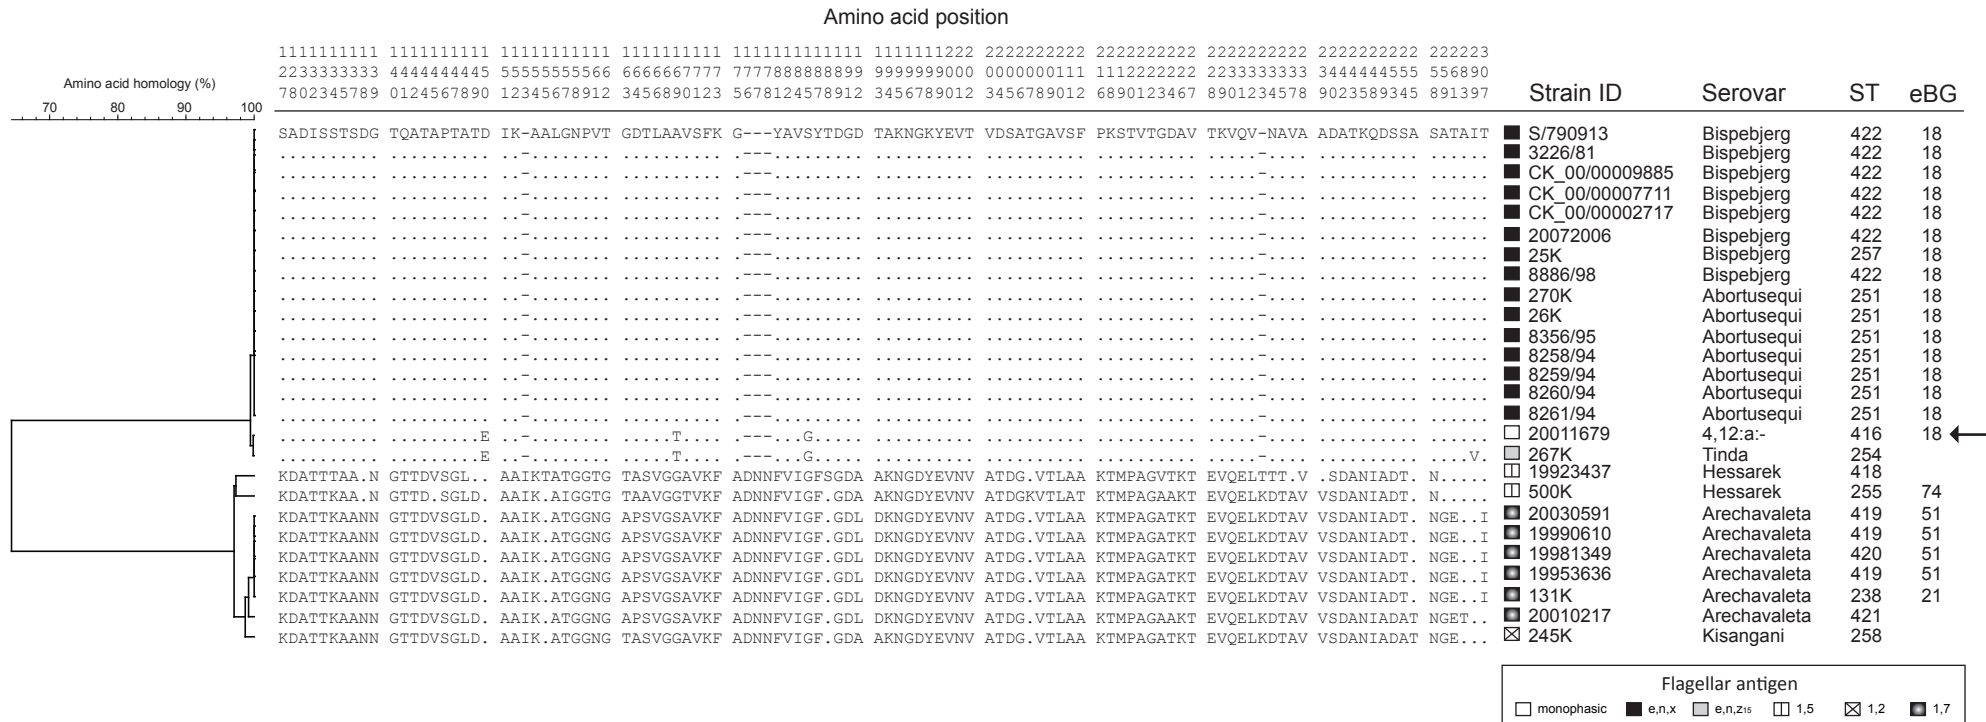

Fig. S2. Amino acid diversity within FljB among isolates subjected to MLST. Details are as in Fig. 3 except that hyphens indicate deletions. Shaded and hatched boxes indicate phase 2 epitopes or monophasic when phase 2 is not expressed. The arrow indicates the exceptional isolate from harbour porpoises from which a *fljB* sequence was obtained.
