# Supplementary material
Source: PubMed Central journal article supplement (PMC3502922)
Supplement: AEM.02310-12_zam999103913so4.pdf [file AEM.02310-12_zam999103913so4.pdf]

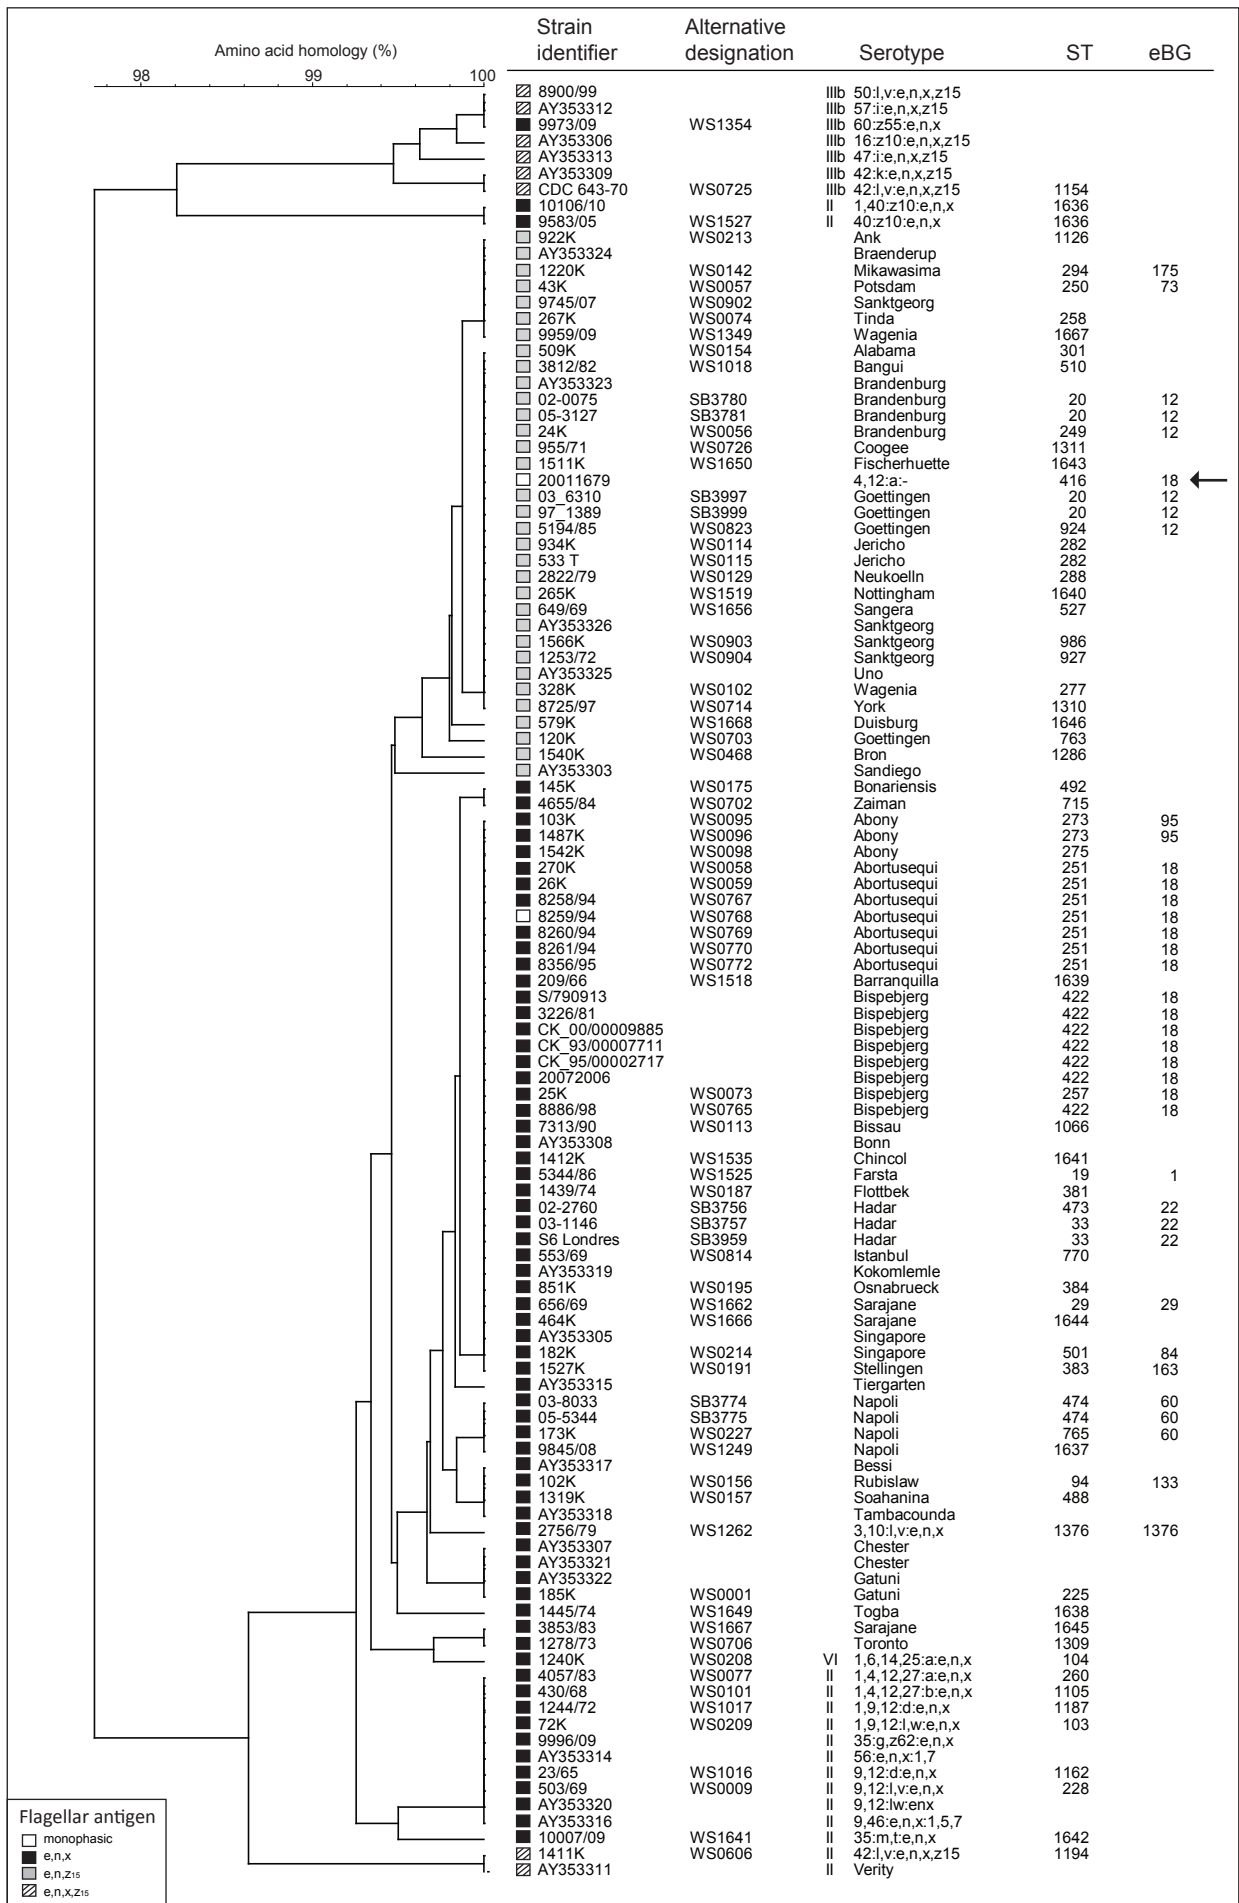

Fig. S3. A UPGMA dendrogram of FljB amino acid sequences within the “e,n” antigen group. The arrow indicates the exceptional isolate from harbour porpoises from which a fljB sequence was obtained. Other details are as in Fig. S2.
