# Supplementary material
Source: PubMed Central journal article supplement (PMC3502922)
Supplement: AEM.02310-12_zam999103913so5.pdf [file AEM.02310-12_zam999103913so5.pdf]

Table S1: Antigenic formulas, STs and frequencies of serovars.

| Serovar           | O antigen*         | H antigen |                     | ST<br>(number of isolates)                   | eBG<br>(number of isolates) | Frequency**<br>(1996-2006) |
|-------------------|--------------------|-----------|---------------------|----------------------------------------------|-----------------------------|----------------------------|
|                   |                    | Phase 1   | Phase 2             |                                              |                             |                            |
| Abortusequi       | 4,12               | -         | e,n,x               | 251 (7)                                      | 18 (7)                      | 1                          |
| Arechavaleta      | 4,[5],12           | a         | 1,7                 | 238 (1), 419 (3), 420 (1), 421 (1), 1063 (1) | 51 (4), 21 (1)              | 171                        |
| Bispebjerg        | <u>1</u> ,4,[5],12 | a         | e,n,x               | 422 (7), 257 (1)                             | 18 (8)                      | 7                          |
| Fulica            | 4,[5],12           | a         | [1,5]               | 256 (1)                                      | 74 (1)                      | 2                          |
| Hessarek          | 4,12,[27]          | a         | 1,5                 | 255 (1), 418 (1)                             | 74 (1)                      | 54                         |
| Kisangani         | <u>1</u> ,4,[5],12 | a         | 1,2                 | 254 (1)                                      | -                           | 29                         |
| 4,12:a:- isolates | 4,12               | a         | -                   | 416 (20),417 (1)                             | 18 (21)                     | 0                          |
| Tinda             | <u>1</u> ,4,12,27  | a         | e,n,z <sub>15</sub> | 258 (1)                                      | -                           | 0                          |

\*Square parentheses indicate variable epitopes which can but do not have to be present in each strain of the serovar. Underlined O factors are determined by phage conversion and are present only if the culture is lysogenized by the corresponding converting phage.

\*\*Frequency of serovars among 434,344 isolates from infections in the U.S.A. and 36,466 isolates from France. Data obtained from <http://www.cdc.gov/ncidod/dbmd/phlisdata/salmonella.htm> and internal records at the French National Reference Center for Salmonella, Institut Pasteur.
