# Supplementary material
Source: PubMed Central journal article supplement (PMC3502922)
Supplement: AEM.02310-12_zam999103913so6.pdf [file AEM.02310-12_zam999103913so6.pdf]

Table S2. List of strains isolated from harbour porpoises during the time period 1992-2010.

| Strain ID | Source* | Site of Isolation                                      | Antigenic formula | PFGE profile |
|-----------|---------|--------------------------------------------------------|-------------------|--------------|
| 19925387  | unique  | Lung                                                   | 4,12:a:-          | X145         |
| 19930560  | unique  | Intestine                                              | 4,12:a:-          | X105         |
| 19930561  | unique  | Swab from lung, intestine                              | 4,12:a:-          | X106         |
| 19931617  | unique  | Viscera                                                | 4,12:a:-          | X007         |
| 19931641  | unique  | Lung                                                   | 4,12:a:-          | X006         |
| 19931891  | P       | Gut                                                    | 4,12:a:-          | X112         |
| 19931892  | P       | Lung                                                   | 4,12:a:-          | X115         |
| 19932227  | D       | Lung                                                   | 4,12:a:-          | X109         |
| 19932228  | D       | Gut                                                    | 4,12:a:-          | X021         |
| 19932229  | D       | Lung                                                   | 4,12:a:-          | X114         |
| 19932246  | unique  | Gut                                                    | 4,12:a:-          | X110         |
| 19932732  | E       |                                                        | 4,12:a:-          | X022         |
| 19932733  | E       | Lung                                                   | 4,12:a:-          | X055         |
| 19933021  | B       | Gut                                                    | 4,12:a:-          | X035         |
| 19933023  | B       | Mesenteric lymph node                                  | 4,12:a:-          | X039         |
| 19933327  | B       |                                                        | 4,12:-:-          | X004         |
| 19941067  | unique  | Lung                                                   | 4,12:a:-          | X017         |
| 19946115  | unique  | Rectal swab                                            | 4,12:-:-          | X089         |
| 19951372  | U       | Lung                                                   | -:a:-             | X146         |
| 19951373  | U       | Lung                                                   | 4,12:-:-          | X155         |
| 19971376  | unique  | Swab from lung, intestine                              | 4,12:a:-          | X005         |
| 19973105  | unique  | Carcase                                                | 4,12:a:-          | X113         |
| 19973682  | unique  | Swab from lung, liver, spleen, kidney                  | 4,12:a:-          | X044         |
| 19974313  | unique  | Swab from lung, kidney, spleen                         | 4,12:a:-          | X071         |
| 19974860  | unique  | Swab from lung, blood                                  | 4,12:a:-          | X107         |
| 19980868  | unique  | Lung                                                   | 4,12:a:-          | X009         |
| 19980869  | unique  | Swab from brain, lung, intestine                       | 4,12:a:-          | X153         |
| 19980938  | unique  | Lung                                                   | 4,12:a:-          | X029         |
| 19981081  | unique  | Lung                                                   | 4,12:a:-          | X033         |
| 19981227  | unique  | Swab from kidney, lung, liver, spleen, small intestine | 4,12:-:-          | X152         |
| 19984245  | Y       | Swab from lung, kidney                                 | 4,12:a:-          | X041         |
| 19990139  | J       | Lung                                                   | 4,12:a:-          | X049         |
| 19990140  | J       | Lung                                                   | 4,12:a:-          | X128         |
| 19990141  | J       | Small intestine                                        | 4,12:a:-          | X127         |
| 19990142  | unique  | Lung                                                   | 4,12:a:-          | X012         |
| 19990308  | unique  | Swab from lung, spleen, small intestine                | 4,12:a:-          | X138         |
| 19990310  | unique  | Lung                                                   | 4,12:a:-          | X125         |
| 19990750  | unique  | Spleen                                                 | 4,12:a:-          | X011         |
| 19990751  | unique  | Swab from lung, liver, brain, blood, intestine         | 4,12:a:-          | X118         |
| 19991034  | unique  | Lung                                                   | 4,12:a:-          | X038         |
| 19991336  | unique  | Lung                                                   | 4,12:-:-          | X061         |
| 19991374  | unique  | Lung                                                   | 4,12:a:-          | X014         |
| 19991934  | unique  | Swab from liver, intestine                             | 4,12:a:-          | X120         |
| 19992324  | unique  | Lung                                                   | 4,12:a:-          | X050         |
| 19993629  | unique  | Swab from lung, intestine                              | 4,12:a:-          | X122         |
| 19994030  | unique  | Swab from spleen, lung, small intestine                | 4,12:a:-          | X068         |
| 20001796  | unique  | Lung                                                   | 4,12:-:-          | X054         |
| 20001971  | unique  | Swab from lung, spleen                                 | 4,12:a:-          | X043         |
| 20003215  | unique  | Liver                                                  | 4,12:a:-          | X003         |
| 20003958  | unique  | Lung                                                   | 4,12:a:-          | X121         |

|          |        |                                                       |            |      |
|----------|--------|-------------------------------------------------------|------------|------|
| 20003959 | unique | small Intestine                                       | 4,12:a:-   | X157 |
| 20005087 | unique | Lung, spleen                                          | 4,12:a:-   | X067 |
| 20011658 | unique | Small intestine                                       | 4,12:a:-   | X062 |
| 20011679 | unique | Swab from lung, small Intestine                       | 4,12:a:-   | X002 |
| 20011680 | unique | Lung                                                  | 4,12:a:-   | X066 |
| 20011681 | unique | Small intestine                                       | 4,12:a:-   | X078 |
| 20012310 | unique | Lung                                                  | 4,12:a:-   | X026 |
| 20012767 | unique | Lung                                                  | 4,12:a:-   | X036 |
| 20020446 | unique | Lung                                                  | 1,4,12:-:- | X148 |
| 20021454 | unique | Lung                                                  | 4,12:a:-   | X027 |
| 20021683 | unique | Swab from lung, liver, small intestine                | 4,12:a:-   | X025 |
| 20022536 | unique | Swab from lung, liver, spleen, blood, small intestine | 4,12:a:-   | X119 |
| 20022816 | unique | Swab from lung, spleen, liver, small intestine        | 4,12:a:-   | X064 |
| 20023867 | unique | Lung                                                  | 4,12:a:-   | X013 |
| 20024005 | unique | Swab from lung, spleen, kidney                        | -:a:-      | X132 |
| 20024070 | unique | Swab from lung, liver                                 | 4,12:a:-   | X063 |
| 20030134 | unique | Lung                                                  | 4,12:a:-   | X057 |
| 20030169 | unique | Swab from brain, lung                                 | 4,12:a:-   | X008 |
| 20030355 | unique | Swab from lung abscess, Spleen, Kidney, rib abscess   | 4,12:a:-   | X059 |
| 20030488 | unique | Lung                                                  | 4,12:a:-   | X124 |
| 20030489 | unique | Intestine                                             | 4,12:a:-   | X024 |
| 20030490 | unique | Swab from lung, lung abscess                          | 4,12:a:-   | X156 |
| 20030841 | unique | Swab from lung, small intestine                       | 4,12:a:-   | X087 |
| 20030842 | unique | Swab from lung, liver, small intestine                | 4,12:a:-   | X045 |
| 20030955 | unique | Swab from lung, brain, spleen, placenta               | 4,5,12:a:- | X126 |
| 20030956 | unique | Swab from lung, liver, kidney, small intestine        | 4,5,12:a:- | X097 |
| 20031332 | unique | Swab from various organs                              | 4,12:a:-   | X040 |
| 20031333 | unique | Small intestine                                       | 4,12:a:-   | X020 |
| 20031797 | unique | Lung                                                  | 4,12:a:-   | X019 |
| 20040212 | unique | Lung                                                  | 4,12:a:-   | X028 |
| 20040213 | unique | Small intestine                                       | 4,12:a:-   | X086 |
| 20040214 | unique | Swab from various organs                              | 4,12:a:-   | X046 |
| 20040461 | unique | Lung                                                  | 4,12:a:-   | X085 |
| 20040628 | unique | node, small intestine                                 | 4,12:a:-   | X144 |
| 20040709 | unique | Lung                                                  | 4,12:a:-   | X151 |
| 20040728 | unique | Swab from lung, liver, spleen                         | 4,12:a:-   | X072 |
| 20040891 | unique | Lung                                                  | 4,12:a:-   | X154 |
| 20041082 | Z      | Lung                                                  | 4,12:a:-   | X041 |
| 20041083 | unique | Lung                                                  | 4,12:a:-   | X048 |
| 20041225 | unique | Swab from lung, kidney, brain, intestine              | 4,12:a:-   | X042 |
| 20050045 | unique | Swab from lung, spleen                                | 4,12:a:-   | X111 |
| 20050114 | unique | Lung                                                  | 4,12:a:-   | X123 |
| 20050182 | unique | Swab from various organs                              | 4,12:a:-   | X098 |
| 20050255 | unique | Swab from various organs                              | 4,12:a:-   | X129 |
| 20050271 | unique | Swab from lung, small intestine                       | 4,12:a:-   | X065 |
| 20050308 | unique | Lung                                                  | 4,12:a:-   | X010 |
| 20050496 | unique | Swab from lung, spleen                                | 4,12:a:-   | X070 |
| 20050497 | unique | Swab from various organs                              | 4,12:a:-   | X150 |
| 20050498 | M      | Lung                                                  | 4,12:a:-   | X060 |

|          |        |                                                       |          |      |
|----------|--------|-------------------------------------------------------|----------|------|
| 20050499 | M      | Brain                                                 | 4,12:a-  | X056 |
| 20051045 | unique | Swab from lung, liver, spleen, blood, small intestine | 4,12:a-  | X108 |
| 20051381 | unique | Swab from various organs                              | 4,12:a-  | X034 |
| 20051859 | unique | Swab from various organs                              | 4,12:a-  | X147 |
| 20052567 | unique | Swab from various organs                              | 4,12:a-  | X088 |
| 20052811 | unique | Swab from various organs                              | 4,12:a-  | X069 |
| 20052866 | unique | Swab from various organs                              | 4,12:a-  | X018 |
| 20053063 | unique | Swab from lung, large Intestine                       | 4,12:a-  | X116 |
| 20060336 | X      | Lung                                                  | 4,12:a-  | X041 |
| 20060794 | H      | Brain                                                 | 4,12:a-  | X039 |
| 20060795 | H      | Mesenteric lymph node                                 | 4,12:a-  | X039 |
| 20060796 | H      | Lung                                                  | 4,12:a-  | X039 |
| 20060797 | H      | Small intestine                                       | 4,12:a-  | X039 |
| 20060798 | H      | Small intestine                                       | 4,12:a-  | X039 |
| 20060799 | H      | Small intestine                                       | 4,12:a-  | X039 |
| 20060984 | Q      | Lung                                                  | 4,12:a-  | X117 |
| 20060985 | Q      | Lung                                                  | 4,12:a-  | X117 |
| 20060986 | Q      | Lung                                                  | 4,12:a-  | X117 |
| 20061048 | S      | Large intestine                                       | 4,12:-:- | X139 |
| 20061049 | S      | Large intestine                                       | 4,12:-:- | X139 |
| 20061050 | S      | Large intestine                                       | 4,12:-:- | X139 |
| 20061175 | S      | Small intestine                                       | 4,12:-:- | X140 |
| 20070116 | O      | Lung                                                  | 4,12:a-  | X099 |
| 20070117 | O      | Lung                                                  | 4,12:a-  | X101 |
| 20070118 | O      | Lung                                                  | 4,12:a-  | X100 |
| 20070119 | O      | Lung                                                  | 4,12:a-  | X102 |
| 20070120 | O      | Lung                                                  | 4,12:a-  | X104 |
| 20070122 | O      | Lung                                                  | 4,12:a-  | X136 |
| 20070123 | O      | Lung                                                  | 4,12:a-  | X137 |
| 20070124 | O      | Kidney                                                | 4,12:a-  | X099 |
| 20070125 | O      | Small intestine                                       | 4,12:a-  | X099 |
| 20070126 | O      | Small intestine                                       | 4,12:a-  | X099 |
| 20070127 | O      | Small intestine                                       | 4,12:a-  | X103 |
| 20070128 | O      | Lung                                                  | 4,12:a-  | X099 |
| 20070541 | F      | Lung                                                  | 4,12:a-  | X045 |
| 20070542 | F      | Lung                                                  | 4,12:a-  | X045 |
| 20070543 | F      | Lung                                                  | 4,12:a-  | X045 |
| 20070544 | F      | Lung                                                  | 4,12:a-  | X030 |
| 20070545 | F      | Lung                                                  | 4,12:a-  | X045 |
| 20070546 | F      | Lung                                                  | 4,12:a-  | X045 |
| 20070547 | F      | Lung                                                  | 4,12:a-  | X045 |
| 20070548 | F      | Lung                                                  | 4,12:a-  | X045 |
| 20070549 | F      | Spleen                                                | 4,12:a-  | X031 |
| 20070550 | F      | Mesenteric lymph node                                 | 4,12:a-  | X032 |
| 20071018 | unique | Swab from lung, mesenteric lymph node                 | 4,12:a-  | X052 |
| 20071019 | V      | Swab from lung, liver, placenta                       | 4,12:a-  | X047 |
| 20071641 | G      | Lung                                                  | 4,12:a-  | X041 |
| 20071642 | G      | Lung                                                  | 4,12:a-  | X041 |
| 20071643 | G      | Lung                                                  | 4,12:a-  | X041 |
| 20071644 | G      | Lung                                                  | 4,12:a-  | X041 |
| 20071645 | G      | Lung                                                  | 4,12:a-  | X037 |
| 20071646 | G      | Mesenteric lymph node                                 | 4,12:a-  | X041 |
| 20071647 | G      | Mesenteric lymph node                                 | 4,12:a-  | X041 |
| 20071648 | G      | Mesenteric lymph node                                 | 4,12:a-  | X041 |

|          |        |                                               |          |      |
|----------|--------|-----------------------------------------------|----------|------|
| 20071649 | G      | Mesenteric lymph node                         | 4,12:a:- | X041 |
| 20071650 | G      | Spleen                                        | 4,12:a:- | X041 |
| 20071651 | G      | Spleen                                        | 4,12:a:- | X041 |
| 20071789 | L      | Lung                                          | 4,12:a:- | X053 |
| 20071790 | L      | Lung                                          | 4,12:a:- | X053 |
| 20071791 | L      | Lung                                          | 4,12:a:- | X053 |
| 20071792 | L      | Lung                                          | 4,12:a:- | X135 |
| 20071793 | L      | Lung                                          | -:a:-    | X134 |
| 20071794 | L      | Lung                                          | -:a:-    | X134 |
| 20080159 | C      | Lung                                          | 4,12:a:- | X092 |
| 20080160 | C      | Lung                                          | 4,12:a:- | X015 |
| 20080161 | C      | Lung                                          | 4,12:a:- | X093 |
| 20080162 | C      | Mesenteric lymph node                         | 4,12:a:- | X090 |
| 20080163 | C      | Mesenteric lymph node                         | 4,12:a:- | X090 |
| 20080164 | C      | Mesenteric lymph node                         | 4,12:a:- | X079 |
| 20080165 | C      | Small intestine                               | 4,12:-:- | X091 |
| 20080166 | C      | Small intestine                               | 4,12:-:- | X079 |
| 20080167 | C      | Small intestine                               | 4,12:a:- | X079 |
| 20080308 | unique | Swab from lung, liver, brain, small intestine | 4,12:a:- | X149 |
| 20080475 | A      | Lung                                          | 4,12:-:- | X001 |
| 20080476 | A      | Lung                                          | 4,12:-:- | X001 |
| 20080477 | A      | Lung                                          | 4,12:-:- | X001 |
| 20080478 | A      | Lung                                          | 4,12:-:- | X001 |
| 20080479 | A      | Lung                                          | 4,12:-:- | X001 |
| 20080480 | A      | Brain                                         | 4,12:-:- | X001 |
| 20080481 | A      | Brain                                         | 4,12:-:- | X001 |
| 20080482 | A      | Brain                                         | 4,12:-:- | X001 |
| 20080483 | A      | Brain                                         | 4,12:-:- | X001 |
| 20080484 | A      | Brain                                         | 4,12:-:- | X001 |
| 20080485 | A      | Mesenteric lymph node                         | 4,12:-:- | X001 |
| 20081083 | W      | Lung                                          | 4,12:a:- | X047 |
| 20081084 | unique | Lung                                          | 4,12:a:- | X016 |
| 20081654 | unique | Swab from lung abscess, small intestine       | 4,12:a:- | X023 |
| 20090361 | unique | Lung                                          | 4,12:a:- | X133 |
| 20100261 | R      | Lung                                          | 4,12:a:- | X130 |
| 20100262 | R      | Lung                                          | 4,12:a:- | X131 |
| 20100369 | N      | Lung                                          | 4,12:a:- | X084 |
| 20100370 | N      | Lung                                          | 4,12:a:- | X083 |
| 20100371 | N      | Lung                                          | 4,12:a:- | X077 |
| 20100372 | N      | Lung                                          | 4,12:a:- | X077 |
| 20100373 | N      | Lung                                          | 4,12:a:- | X077 |
| 20100374 | N      | Lung                                          | 4,12:a:- | X073 |
| 20100375 | N      | Lung                                          | 4,12:a:- | X075 |
| 20100376 | N      | Spleen                                        | 4,12:a:- | X074 |
| 20100377 | N      | Small intestine                               | 4,12:a:- | X076 |
| 20100378 | N      | Small intestine                               | 4,12:a:- | X076 |
| 20100379 | N      | Small intestine                               | 4,12:a:- | X076 |
| 20100380 | N      | Small intestine                               | 4,12:a:- | X076 |
| 20100381 | N      | Small intestine                               | 4,12:a:- | X082 |
| 20100382 | N      | Allantoic fluid                               | 4,12:a:- | X082 |
| 20100383 | N      | Allantoic fluid                               | 4,12:a:- | X081 |
| 20100384 | N      | Allantoic fluid                               | 4,12:a:- | X081 |
| 20100385 | N      | Placenta                                      | 4,12:a:- | X081 |

|          |        |                 |          |      |
|----------|--------|-----------------|----------|------|
| 20100386 | N      | Placenta        | 4,12:a:- | X081 |
| 20100387 | N      | Placenta        | 4,12:a:- | X080 |
| 20100388 | N      | Placenta        | 4,12:a:- | X080 |
| 20100428 | T      | Lung            | 4,12:a:- | X142 |
| 20100429 | T      | Lung            | 4,12:a:- | X142 |
| 20100430 | T      | Lung            | 4,12:a:- | X142 |
| 20100431 | T      | Lung            | 4,12:a:- | X143 |
| 20100432 | T      | Lung            | 4,12:a:- | X142 |
| 20100433 | T      | Lung            | 4,12:a:- | X142 |
| 20100434 | T      | Small intestine | 4,12:a:- | X142 |
| 20100435 | T      | Small intestine | 4,12:a:- | X142 |
| 20100436 | T      | Small intestine | 4,12:a:- | X141 |
| 20100437 | T      | Small intestine | 4,12:a:- | X141 |
| 20100438 | T      | Small intestine | 4,12:a:- | X141 |
| 20100439 | T      | Small intestine | 4,12:a:- | X141 |
| 20101408 | unique | Small intestine | 4,12:a:- | X058 |
| 20102155 | K      | Lung            | 4,12:a:- | X095 |
| 20102156 | K      | Lung            | 4,12:a:- | X051 |
| 20102158 | K      | Lung            | 4,12:a:- | X096 |
| 20102161 | K      | Lung            | 4,12:a:- | X094 |
| 20102162 | K      | Lung            | 4,12:a:- | X094 |
| 20102163 | K      | Spleen          | 4,12:a:- | X094 |
| 20102164 | K      | Spleen          | 4,12:a:- | X094 |
| 20102165 | K      | Spleen          | 4,12:a:- | X096 |

\* Unique designates single isolates from individual animals where only one isolate was obtained, and whose PFGE pattern was not found in any other isolate. For all other isolates, a letter indicates the animal source, as shown in Fig. 1.
