# Supplementary material
Source: PubMed Central journal article supplement (PMC3502922)
Supplement: AEM.02310-12_zam999103913so7.pdf [file AEM.02310-12_zam999103913so7.pdf]

Table S3. Strain information and MLST results.

| Strain ID      | Alternative designation | Serovar     | Antigenic formula   | Host             | MLST alleles |             |             |             |             |             |             | ST   | eBG | Source lab* |
|----------------|-------------------------|-------------|---------------------|------------------|--------------|-------------|-------------|-------------|-------------|-------------|-------------|------|-----|-------------|
|                |                         |             |                     |                  | <i>aroC</i>  | <i>dnaN</i> | <i>hemD</i> | <i>hisD</i> | <i>purE</i> | <i>sucA</i> | <i>thrA</i> |      |     |             |
| 270K           | WS0058                  | Abortusequi | 4,12:-:e,n,x        | Unknown          | 93           | 4           | 18          | 89          | 5           | 96          | 87          | 251  | 18  | IP          |
| 26K            | WS0059                  | Abortusequi | 4,12:-:e,n,x        | Horse            | 93           | 4           | 18          | 89          | 5           | 96          | 87          | 251  | 18  | IP          |
| 8258/94        | WS0767                  | Abortusequi | 4,12:-:e,n,x        | Unknown          | 93           | 4           | 18          | 89          | 5           | 96          | 87          | 251  | 18  | IP          |
| 8259/94        | WS0768                  | Abortusequi | 4,12:-:-            | Unknown          | 93           | 4           | 18          | 89          | 5           | 96          | 87          | 251  | 18  | IP          |
| 8260/94        | WS0769                  | Abortusequi | 4,12:-:e,n,x        | Unknown          | 93           | 4           | 18          | 89          | 5           | 96          | 87          | 251  | 18  | IP          |
| 8261/94        | WS0770                  | Abortusequi | 4,12:-:e,n,x        | Unknown          | 93           | 4           | 18          | 89          | 5           | 96          | 87          | 251  | 18  | IP          |
| 8356/95        | WS0772                  | Abortusequi | 4,12:-:e,n,x        | Horse            | 93           | 4           | 18          | 89          | 5           | 96          | 87          | 251  | 18  | IP          |
| 20030591       |                         | Archavaleta | 4,5,12:a:1,7        | Unknown          | 13           | 11          | 25          | 72          | 10          | 23          | 23          | 419  | 51  | SSRL        |
| 19990610       |                         | Archavaleta | 4,5,12:a:1,7        | Human            | 13           | 11          | 25          | 72          | 10          | 23          | 23          | 419  | 51  | SSRL        |
| 19981349       |                         | Archavaleta | 4,5,12:a:1,7        | Human            | 13           | 11          | 25          | 72          | 10          | 141         | 23          | 420  | 51  | SSRL        |
| 19953636       |                         | Archavaleta | 4,5,12:a:1,7        | Human            | 13           | 11          | 25          | 72          | 10          | 23          | 23          | 419  | 51  | SSRL        |
| 20010217       |                         | Archavaleta | 4,5,12:a:1,7        | Human            | 142          | 123         | 110         | 142         | 137         | 7           | 139         | 421  |     | SSRL        |
| 131K           | WS0036                  | Archavaleta | 4,5,12:a:1,7        | Human            | 11           | 10          | 25          | 13          | 12          | 35          | 4           | 238  | 21  | IP          |
| 274/67         | WS0072                  | Archavaleta | 4,5,12:a:-          | Human            | 208          | 222         | 164         | 271         | 244         | 19          | 214         | 1063 |     | IP          |
| S/790913       |                         | Bispebjerg  | 4,5,12:a:e,n,x      | Unknown          | 93           | 4           | 18          | 90          | 5           | 96          | 87          | 422  | 18  | SSRL        |
| 3226/81        |                         | Bispebjerg  | 4,5,12:a:e,n,x      | Human            | 93           | 4           | 18          | 90          | 5           | 96          | 87          | 422  | 18  | IP          |
| CK_00/00009885 |                         | Bispebjerg  | 1,4,5,12:a:e,n,x    | Turtle           | 93           | 4           | 18          | 90          | 5           | 96          | 87          | 422  | 18  | AAHFS       |
| CK_93/00007711 |                         | Bispebjerg  | 1,4,5,12:a:e,n,x    | Turtle           | 93           | 4           | 18          | 90          | 5           | 96          | 87          | 422  | 18  | AAHFS       |
| CK_95/00002717 |                         | Bispebjerg  | 1,4,5,12:a:e,n,x    | Turtle           | 93           | 4           | 18          | 90          | 5           | 96          | 87          | 422  | 18  | AAHFS       |
| 20072006       |                         | Bispebjerg  | 4,12:a:e,n,x        | Unknown          | 93           | 4           | 18          | 90          | 5           | 96          | 87          | 422  | 18  | SSRL        |
| 25K            | WS0073                  | Bispebjerg  | 1,4,5,12:a:e,n,x    | Human            | 41           | 4           | 18          | 90          | 5           | 96          | 89          | 257  | 18  | IP          |
| 8886/98        | WS0765                  | Bispebjerg  | 4,5,12:a:e,n,x      | Bird (falcon)    | 93           | 4           | 18          | 90          | 5           | 96          | 87          | 422  | 18  | IP          |
| 539K           |                         | Fulica      | 4,12:a:-            | Poultry          | 94           | 4           | 18          | 46          | 90          | 9           | 34          | 256  | 74  | IP          |
| 19990751       |                         | 4,12:a:-    | 4,12:a:-            | Harbour porpoise | 141          | 4           | 18          | 90          | 5           | 96          | 87          | 416  | 18  | SSRL        |
| 19932228       |                         | 4,12:a:-    | 4,12:a:-            | Harbour porpoise | 141          | 4           | 18          | 90          | 5           | 96          | 87          | 416  | 18  | SSRL        |
| 19980869       |                         | 4,12:a:-    | 4,12:a:-            | Harbour porpoise | 141          | 4           | 18          | 90          | 5           | 96          | 87          | 416  | 18  | SSRL        |
| 19931891       |                         | 4,12:a:-    | 4,12:a:-            | Harbour porpoise | 141          | 4           | 18          | 140         | 5           | 96          | 87          | 417  | 18  | SSRL        |
| 20011658       |                         | 4,12:a:-    | 4,12:a:-            | Harbour porpoise | 141          | 4           | 18          | 90          | 5           | 96          | 87          | 416  | 18  | SSRL        |
| 19991374       |                         | 4,12:a:-    | 4,12:a:-            | Harbour porpoise | 141          | 4           | 18          | 90          | 5           | 96          | 87          | 416  | 18  | SSRL        |
| 19990310       |                         | 4,12:a:-    | 4,12:a:-            | Harbour porpoise | 141          | 4           | 18          | 90          | 5           | 96          | 87          | 416  | 18  | SSRL        |
| 20011679       |                         | 4,12:a:-    | 4,12:a:-            | Harbour porpoise | 141          | 4           | 18          | 90          | 5           | 96          | 87          | 416  | 18  | SSRL        |
| 19991934       |                         | 4,12:a:-    | 4,12:a:-            | Harbour porpoise | 141          | 4           | 18          | 90          | 5           | 96          | 87          | 416  | 18  | SSRL        |
| 20012310       |                         | 4,12:a:-    | 4,12:a:-            | Harbour porpoise | 141          | 4           | 18          | 90          | 5           | 96          | 87          | 416  | 18  | SSRL        |
| 20041082       |                         | 4,12:a:-    | 4,12:a:-            | Harbour porpoise | 141          | 4           | 18          | 90          | 5           | 96          | 87          | 416  | 18  | SSRL        |
| 19984245       |                         | 4,12:a:-    | 4,12:a:-            | Harbour porpoise | 141          | 4           | 18          | 90          | 5           | 96          | 87          | 416  | 18  | SSRL        |
| 20040213       |                         | 4,12:a:-    | 4,12:a:-            | Harbour porpoise | 141          | 4           | 18          | 90          | 5           | 96          | 87          | 416  | 18  | SSRL        |
| 20040728       |                         | 4,12:a:-    | 4,12:a:-            | Harbour porpoise | 141          | 4           | 18          | 90          | 5           | 96          | 87          | 416  | 18  | SSRL        |
| 19990140       |                         | 4,12:a:-    | 4,12:a:-            | Harbour porpoise | 141          | 4           | 18          | 90          | 5           | 96          | 87          | 416  | 18  | SSRL        |
| 19931617       |                         | 4,12:a:-    | 4,12:a:-            | Harbour porpoise | 141          | 4           | 18          | 90          | 5           | 96          | 87          | 416  | 18  | SSRL        |
| 19932732       |                         | 4,12:a:-    | 4,12:a:-            | Harbour porpoise | 141          | 4           | 18          | 90          | 5           | 96          | 87          | 416  | 18  | SSRL        |
| 20030490       |                         | 4,12:a:-    | 4,12:a:-            | Harbour porpoise | 141          | 4           | 18          | 90          | 5           | 96          | 87          | 416  | 18  | SSRL        |
| 20050497       |                         | 4,12:a:-    | 4,12:a:-            | Harbour porpoise | 141          | 4           | 18          | 90          | 5           | 96          | 87          | 416  | 18  | SSRL        |
| 19951373       |                         | 4,12:a:-    | 4,12:-:-            | Harbour porpoise | 141          | 4           | 18          | 90          | 5           | 96          | 87          | 416  | 18  | SSRL        |
| 19951372       |                         | 4,12:a:-    | rough:a:-           | Harbour porpoise | 141          | 4           | 18          | 90          | 5           | 96          | 87          | 416  | 18  | SSRL        |
| 19923437       |                         | Hessarek    | 4,12:a:1,5          | Unknown          | 111          | 63          | 25          | 141         | 40          | 71          | 4           | 418  |     | SSRL        |
| 500K           | WS0070                  | Hessarek    | 4,12:a:1,5          | Bird (crow)      | 15           | 4           | 18          | 46          | 90          | 9           | 34          | 255  | 74  | IP          |
| 245K           | WS0069                  | Kisangani   | 4,5,12:a:1,2        | Human            | 20           | 7           | 3           | 62          | 89          | 9           | 12          | 254  |     | IP          |
| 267K           | WS0074                  | Tinda       | 1,4,12,27:a:e,n,z15 | Water            | 6            | 87          | 79          | 91          | 91          | 9           | 90          | 258  |     | IP          |

\* AAHFS- Austrian Agency for Health and Food Safety (Vienna, Austria), IP- Institut Pasteur (Paris, France), SSRL- Scottish Salmonella Reference Laboratory (Glasgow, UK)
