# Supplementary material
Source: PubMed Central journal article supplement (PMC3502922)
Supplement: AEM.02310-12_zam999103913so8.pdf [file AEM.02310-12_zam999103913so8.pdf]

Table S4. Oligonucleotide primers used for PCR amplification and sequencing of *fliC* and *fljB*.

| Name    | Gene        | Antigen       | Direction | Purpose             | Sequence (5'-->3')     |
|---------|-------------|---------------|-----------|---------------------|------------------------|
| FSa1*   | <i>fliC</i> | universal     | forward   | PCR amplification   | CAAGTCATTAATACAAACAGCC |
| rFSa1*  | <i>fliC</i> | universal     | reverse   | PCR amplification   | TTAACGCAGTAAAGAGAGGAC  |
| OC10926 | <i>fliC</i> | a             | forward   | internal sequencing | GCTACATTAAGCACTACTG    |
| OC10927 | <i>fliC</i> | a             | reverse   | internal sequencing | CAGTAGTGCTTAATGTAGC    |
| OC10928 | <i>fliC</i> | a             | forward   | internal sequencing | ATGGGCAGCAGTCAACTG     |
| OC10929 | <i>fliC</i> | a             | reverse   | internal sequencing | CAGTTGACTGCTGCCCAT     |
| FSa2*   | <i>fljB</i> | universal     | forward   | PCR amplification   | CAAGTAATCAACACTAACAGTC |
| rFSa2*  | <i>fljB</i> | universal     | reverse   | PCR amplification   | TTAACGTAACAGAGACAGCAC  |
| OC10930 | <i>fljB</i> | e,n complex   | forward   | internal sequencing | CTACCTATAGTGATGGTACT   |
| OC10931 | <i>fljB</i> | e,n complex   | reverse   | internal sequencing | AGTACCATCACTATAGGTAG   |
| OC10932 | <i>fljB</i> | e,n complex   | forward   | internal sequencing | AAGACATTTTGACCAATGTC   |
| OC10933 | <i>fljB</i> | e,n complex   | reverse   | internal sequencing | GACATTGGTCAAAATGTCTT   |
| OC10969 | <i>fljB</i> | 1,2/ 1,5/ 1,7 | forward   | internal sequencing | AAACYATCGAYATCGATCTG   |
| OC10970 | <i>fljB</i> | 1,2/ 1,5/ 1,7 | reverse   | internal sequencing | TGCRGCGTAATAYTTATC     |
| OC10967 | <i>fljB</i> | 1,2/ 1,5/ 1,7 | forward   | internal sequencing | CGCTGAACGAAATCAACAAC   |
| OC10968 | <i>fljB</i> | 1,2/ 1,5/ 1,7 | reverse   | internal sequencing | GGGTTTTCGGTGGTTTTAGC   |

\* from Dauga, C., A. Zabrovskaja, and P. A. Grimont. 1998. Restriction fragment length polymorphism analysis of some flagellin genes of *Salmonella enterica*. J. Clin. Microbiol. 36:2835-2843.
