# Supplementary material
Source: PubMed Central journal article supplement (PMC3502922)

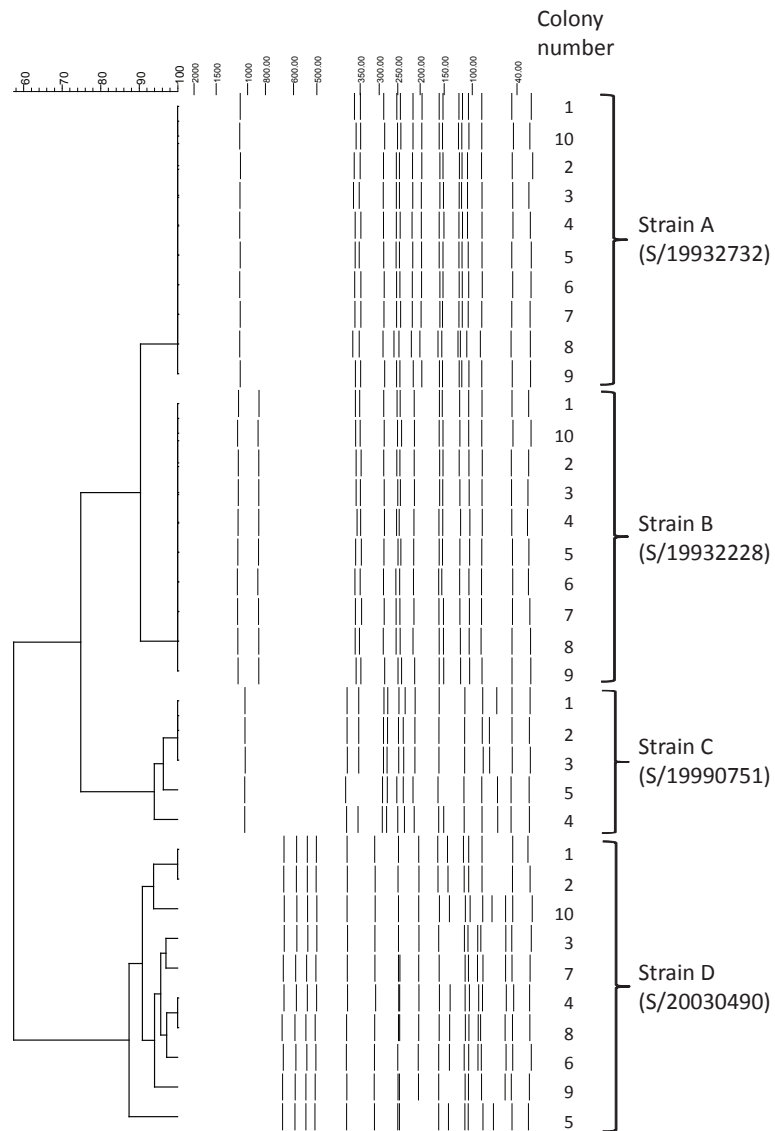

Fig. S1. A UPGMA dendrogram of PFGE profiles for multiple colonies from selected strains.

Supplement: AEM.02310-12_zam999103913so2.pdf [file AEM.02310-12_zam999103913so2.pdf]
